# Supplementary material for: DS-7080a, a Selective Anti-ROBO4 Antibody, Shows Anti-Angiogenic Efficacy with Distinctly Different Profiles from Anti-VEGF Agents
Source: PubMed Central journal article supplement (PMC7442859; doi:10.1167/tvst.9.9.7), 2020-08-05
Supplement: tvst-9-9-7_s001.pdf [file tvst-9-9-7_s001.pdf]

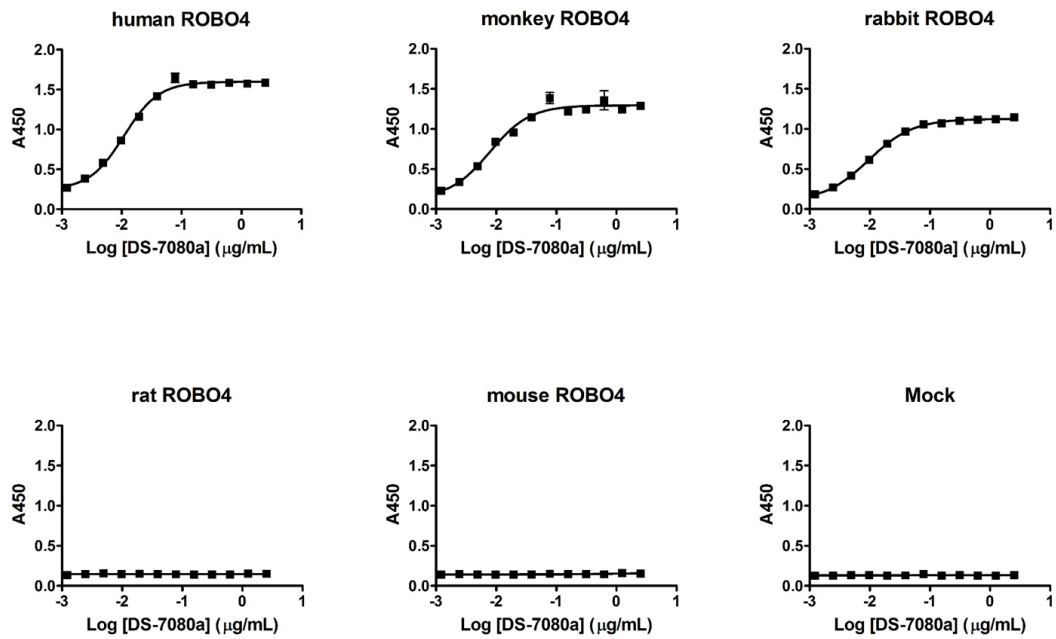

**Supplementary Figure S1 DS-7080a cross-reacts to human, cynomolgus monkey, and rabbit ROBO4.**

The species cross-reactivity of DS-7080a to ROBO4 orthologs was measured by cell ELISA. Each absorbance value at 450 nm (A450) represents the mean  $\pm$  SE from triplicate wells.
