# Supplementary material for: DS-7080a, a Selective Anti-ROBO4 Antibody, Shows Anti-Angiogenic Efficacy with Distinctly Different Profiles from Anti-VEGF Agents
Source: PubMed Central journal article supplement (PMC7442859; doi:10.1167/tvst.9.9.7), 2020-08-05
Supplement: tvst-9-9-7_s003.pdf [file tvst-9-9-7_s003.pdf]

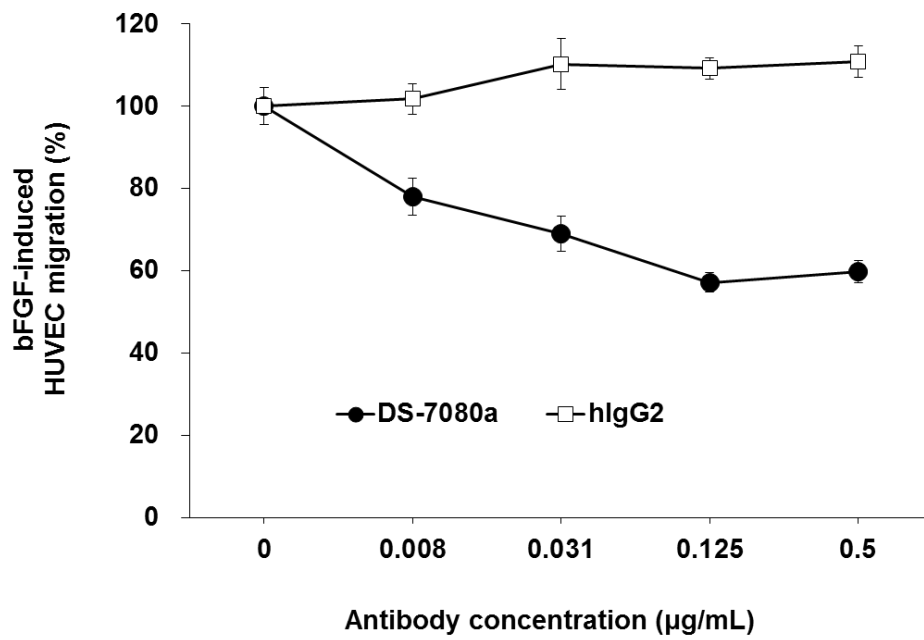

**Supplementary Figure S3 DS-7080a dose-dependently suppresses HUVEC migration induced by bFGF.**

The inhibitory activities of DS-7080a and hlgG2 at the concentrations ranging from 0.008 to 0.5 µg/mL against HUVEC migration stimulated with 10 ng/mL of bFGF were evaluated. Each point represents the mean ± SE of sextuplicate wells.
